1 **Range size dynamics can explain why evolutionarily age and diversification rate**  
2 **correlate with contemporary extinction risk in plants**

3 Andrew J. Tanentzap<sup>\*1</sup>, Javier Igea<sup>1</sup>, Matthew G. Johnston<sup>1</sup>, Matthew J. Larcombe<sup>2</sup>

4 <sup>1</sup>Ecosystems and Global Change Group, Department of Plant Sciences, University of  
5 Cambridge, Downing Street, Cambridge, CB2 3EA, UK

6 <sup>2</sup>Department of Botany, University of Otago, Dunedin, 9054, New Zealand

7 \*Correspondence: [ajt65@cam.ac.uk](mailto:ajt65@cam.ac.uk)

8 **Abstract**

9 Extinction threatens many species, yet few factors predict this risk across the plant Tree of  
10 Life (ToL). Taxon age is one factor that may associate with extinction if occupancy of  
11 geographic and adaptive zones varies with time, but evidence for such an association has  
12 been equivocal. Age-dependent occupancy can also influence diversification rates and thus  
13 extinction risk where new taxa have small range and population sizes. Here we analysed 509  
14 well-sampled genera from across the plant ToL. We found that a greater proportion of  
15 species were threatened by extinction in younger and faster-diversifying genera. Repeating  
16 our analyses in two large, well-sampled groups, we found that extinction risk increased with  
17 evolutionary age in conifer species but not palms. Potential range size decreased in older,  
18 non-threatened conifers more strongly than in threatened taxa, suggesting that range size  
19 dynamics may explain differing patterns of extinction risk across the ToL with consequences  
20 for biodiversity conservation.

21 **Keywords:** conservation, environmental change, macroecology, macroevolution

22 phylogenetics

**Article type:** Note

**Number of words in the text:** 3381

## 23 **Introduction**

24 Much of the world's biodiversity is threatened by extinction because of small geographic  
25 ranges and/or population sizes (Pimm et al. 2014). In addition to having traits that promote  
26 small ranges and population sizes independent of phylogeny, such as those associated with  
27 life history and resource use, some species may be more threatened by extinction because of  
28 their evolutionary history (Bennett and Owens 1997; Purvis et al. 2000; Johnson et al. 2002;  
29 Arregoitia et al. 2013). Extinction is consequently non-randomly distributed across the Tree  
30 of Life (ToL), suggesting that chance events and human activities alone may not be fully  
31 responsible for explaining species losses (Bennett and Owens 1997; Purvis et al. 2000;  
32 Vamosi and Wilson 2008). Identifying macro-evolutionary predictors of extinction risk can  
33 therefore help to assess future conservation status where range and population data are  
34 lacking and identify reasons for its non-randomness across the ToL (Jetz and Freckleton  
35 2015).

36 Taxon age is one measure of the amount of environmental and evolutionary change  
37 that species have experienced and may be associated with extinction risk for at least two  
38 reasons. The first relates to the idea that older taxa should be less at risk of extinction  
39 because they have had more time to disperse across a greater range (Paul et al. 2009; Ceolin  
40 and Giehl 2017), consistent with the age-and-area hypothesis (Willis 1926). While  
41 differences in the time for dispersal may weaken over long time scales (i.e. millions of years),  
42 younger taxa may also face less available space and resources as niches fill through time  
43 irrespective of dispersal ability (Tanentzap et al. 2015). As new taxa initially tend to have  
44 small range and population sizes, especially if speciation started from small reproductively  
45 isolated populations that occupy narrow adaptive spaces (Valente et al. 2010; Castiglione et  
46 al. 2017), younger species in rapidly diversifying clades should face a greater risk of  
47 extinction (Davies et al. 2011; Greenberg & Mooers 2017).

48           A second historical explanation for variation in extinction risk relates to differences in  
49 niche breadth among species of different ages. Older species may have survived long-term  
50 environmental changes because they are more generalist (Liow 2007). As broader niches are  
51 positively associated with larger ranges (Slatyer et al. 2013), this explanation would result in  
52 another positive age-and-area association. By contrast, there may be a negative correlation  
53 between age and extinction risk if older species are more specialised and have smaller ranges.  
54 We term this idea the evolutionary specialism hypothesis. Older species can appear more  
55 specialised because traits that were once advantageous became less adaptive as environments  
56 diverged from past selection regimes (Wilson 1959; Žliobaitė et al. 2017). More specialist  
57 species with narrower niches and geographic ranges may only persist over long time periods  
58 in refugia or by having large local population sizes (Williams et al. 2009).

59           The potential for species to expand their range and reduce extinction risk with time  
60 may ultimately depend on their mode of speciation. Repeated range expansion and  
61 contraction (i.e. “taxon cycles”) that isolate peripheral populations consistent with centrifugal  
62 or peripatric speciation can produce small ranges in descendent taxa (Gaston 1998).  
63 Consequently, older species may have a lower extinction risk because they have had more  
64 time to disperse and expand their range, and experience less niche pre-emption from earlier  
65 evolving competitors (Tanentzap et al. 2015). Lineages with high diversification rates under  
66 this mode of speciation can similarly face greater extinction by producing species that have  
67 small ranges (Schwartz and Simberloff 2001). By contrast, any signature of time in  
68 extinction risk distributions may be absent with vicariant speciation because asymmetry in  
69 the ranges of ancestors and daughter species is consistently smaller and ancestral species  
70 often disappear via cladogenesis (Gaston 1998).

71           Evidence that taxon age is associated with extinction varies among lineages, so testing  
72 correlations in relation to range size can help explain this variation and make generalisations

73 across different divisions in the ToL. Previous work in birds (Gaston and Blackburn 1997)  
74 and marsupials (Johnson et al. 2002) found that older lineages were more threatened by  
75 extinction, whilst the reverse was shown across non-lemur primates (Arregoitia et al. 2013).  
76 The only study on plants, to our knowledge, found a higher extinction risk in younger, rapidly  
77 diversifying clades of the South African Cape (Davies et al. 2011). Broader generalisations  
78 across plants have not been possible until now because of poor taxonomic sampling that  
79 prevents reliable divergence times from being estimated.

80 Here, we tested whether younger and faster-evolving lineages were associated with  
81 greater extinction risk across 509 genera representing 9,174 species. We did so by combining  
82 the largest time-calibrated phylogenetic tree presently estimated for vascular plants with all  
83 available peer-reviewed assessments of conservation status from the International Union for  
84 Conservation of Nature (IUCN) *Red List* (2016). We complemented our findings with  
85 analyses for two large, ancient, and widespread plant clades (conifers and palms). These  
86 analyses allowed us to address concerns around estimating divergence times from the larger  
87 but under-sampled phylogenetic tree and threat status from incompletely sampled genera. By  
88 working at the species-level, we could also collate geographic distribution data to test the  
89 age-and-area and specialism hypotheses, and how they might explain differences in age-  
90 extinction correlations between taxonomic groups with contrasting histories. Positive  
91 correlations between taxon age and range size would support the idea that older species have  
92 had more time for dispersal (i.e. age-and-area hypothesis), whereas a negative correlation  
93 would support the idea that older species are more specialist.

94

## 95 **Methods**

### 96 *Data assembly*

97 We first selected genera for which we could confidently estimate the time of divergence from  
98 their sister genera, i.e. ‘stem age’. Genera were selected from the time-calibrated, species-  
99 level phylogenetic tree of Qian and Jin (2016), which was an updated version of Zanne et al.  
100 (2014). The selected genera came from densely sampled clades (i.e. families) to circumvent  
101 low sampling across the broader tree both at a species- and genus-level. For each family, we  
102 calculated the proportion of genera that were sampled in the phylogeny from the taxonomic  
103 database curated by *taxonlookup* v1.1.1 (Pennell et al. 2016) in R v3.2 and retained those  
104 with  $\geq 60\%$  coverage. We also used stem ages because they only require one species to be  
105 sampled within each genus and reflect the entire evolutionary history of clades unlike crown  
106 ages that can have young age biases because they consider only extant species (Scholl and  
107 Wiens 2016). Taxa outside of an established “core clade” for each genus, as determined  
108 using *MonoPhy* in R (Schwery and O’Meara 2016), were removed prior to all calculations.

109         After calculating ages from the large tree, we intersected the selected genera with  
110 25,452 IUCN assessments and calculated the proportion of species in each genus threatened  
111 with extinction. Threat status is jointly determined from abundance, recent temporal change  
112 in population size, and various measures of geographic distribution, such as occupancy and  
113 fragmentation (IUCN 2016). Therefore, metrics of range size alone may not entirely predict  
114 extinction risk despite the potential to use these terms interchangeably. We further restricted  
115 our analysis to genera with  $>1$  species, of which  $\geq 20\%$  had sufficient data to be assessed for  
116 extinction risk. We excluded 154 monotypic genera because these would confound our  
117 analyses as they all had the same diversification rate irrespective of lineage age. Overall, 509  
118 genera had both reliable age and risk status data spanning 4,925 IUCN species-level  
119 assessments.

120         We also estimated net diversification rates for the 509 genera. We used a well-  
121 established method-of-moments estimator that assumed diversification rates were constant

122 over time within genera given a known stem age and species richness (Magallon and  
123 Sanderson 2001). Following standard practice, we assumed three values of relative  
124 extinction  $\epsilon$  of 0.0, 0.5 and 0.9 when estimating diversification (Magallon and Sanderson  
125 2001). All taxonomy was standardised to The Plant List nomenclature using the *Taxonstand*  
126 R package prior (Cayuela et al. 2012).

127 We also repeated our diversification analysis as above with two large clades that were  
128 well sampled at a species-level in separate time-calibrated phylogenies. These clades  
129 included 70% of all 651 accepted Pinales (extant conifers) (Leslie et al. 2012) and all 2,539  
130 Areaceae (palms) (Faurby et al. 2016). We intersected risk statuses of the two clades with  
131 species stem ages, giving  $n = 433$  and  $547$ , respectively. For the palms, we used the  
132 maximum clade credibility tree that we computed from the posterior distribution of trees that  
133 was generated using topological constraints based on Govaerts taxonomy recommended in  
134 Faurby et al. (2016).

135 Finally, we assembled range data for our two large clades. Georeferenced records  
136 with no flagged issues were downloaded from the Global Biodiversity Information Facility  
137 ([www.gbif.org](http://www.gbif.org)). Conifer data were supplemented by published records absent from GBIF  
138 (table A1). All duplicate and spatially invalid records (e.g. non-numerical, exceeding global  
139 extent, located in the ocean, urban areas, or country centroids) were removed with the R  
140 package *sampbias*. Using the occurrences, we estimated potential range size with a  
141 mechanistic species distribution model (SDM) that predicted the physiological tolerances of  
142 species for growth from distribution data (Higgins et al. 2012). Absence points for the SDM  
143 were generated using standard approaches (details given in Appendix A). We then summed  
144 the total number of equal-area (Mollweide projected) 0.25 decimal degree grid cells occupied  
145 by each species. We found no evidence that sampling varied systematically with species age  
146 in a way that would bias our subsequent analyses (table B1).

147

148 *Statistical analyses*

149 We separately tested whether genera with a greater proportion of threatened taxa were  
150 correlated with younger ages and faster diversification rates using phylogenetic least squares  
151 (PGLS) regression. Although the least squares model assumed normally distributed errors,  
152 and the response variable was a proportion with binomial errors, PGLS is appropriate for  
153 testing the null hypothesis of no statistically significant effect of an independent variable on a  
154 non-Gaussian response (Ives 2015). We also fitted the PGLS regression using the *gls*  
155 function in R because this approach, unlike other model fitting functions that incorporated  
156 phylogenetic information (e.g. *phyloglm*), could account for different sample sizes across  
157 genera by weighting observations with the inverse square-root of the number of IUCN  
158 assessments that they received (Garamszegi and Møller 2010). Following standard practice,  
159 the PGLS was fitted with maximum-likelihood transformations of branch lengths based on  
160 the strength of phylogenetic covariance estimated by Pagel's  $\lambda$  (Orme 2013). Both ages and  
161 diversification rates were log-transformed. Models were not fitted with both predictors  
162 simultaneously as they were highly correlated (Spearman's  $r < -0.79$ ). We repeated this  
163 analysis in conifers and palms, and again did not simultaneously fit age and diversification  
164 rates given high correlations ( $r = -0.78$  to  $-0.91$ ). Fit of the PGLS was summarised by the  
165 correlation coefficient  $r$  between predicted and observed values.

166 For conifers and palms, we also tested whether extinction risk was associated with  
167 younger species and how this was influenced by range dynamics. We first fitted logistic  
168 regression models to threat status as a function of species age using penalised maximum-  
169 likelihood and accounted for phylogenetic non-independence of species with the *phylolm* R

170 package (Ho et al. 2014). Predictors were scaled to a mean of 0 and standard deviation of 1  
171 to compare effects.

172 We also tested how potential range size was associated with species age in both  
173 conifers and palms. First, we used PGLS to test whether older ages correlated with larger  
174 range sizes, which by definition reduce extinction risk (IUCN 2016), and allowed the effect  
175 to vary with threat status (i.e. statistical interaction). We expected threatened species would,  
176 by definition, always have relatively small ranges, producing an invariant or weak age-range  
177 association. By contrast, non-threatened species should reach larger ranges with time if the  
178 age-and-area hypotheses was supported, whereas the reverse could be expected under the  
179 specialism hypothesis. One limitation with this analysis is that it does not compare  
180 threatened and non-threatened species of the same age, and so can introduce biases if there  
181 are systematic differences in the ages of these two groups.

182 To further analyse how potential range size was associated with species age, we  
183 undertook a second comparison that focused on pairs of sister species with contrasting threat  
184 status. For each pair, we calculated the difference in potential range size between the sisters,  
185 so as to avoid pseudoreplication, and correlated this with their age. We compared this  
186 association to when sisters had the same threat status to test the null hypothesis that being  
187 threatened with extinction does not change age-range associations. Focusing on sister pairs  
188 was desirable because it can minimize factors that confound age-range associations, such as  
189 unobserved extinctions (Hodge and Bellwood 2015). Range differences can also shed light  
190 on the underlying mode of speciation. For example, there may be greater disparity in the  
191 ranges of young species pairs under peripatric as opposed to allopatric speciation (Gaston  
192 1998; Hodge and Bellwood 2015), resulting in a negative correlation between age and range  
193 asymmetry (fig. A1). This pattern may ultimately result in either a positive or negative  
194 association between age and extinction status, depending on whether species expand their



195 ranges with time (i.e. age-and-area hypothesis) or contract their ranges as environments  
196 change (i.e. specialism hypothesis). We tested if this correlation between age and range  
197 asymmetry was different from randomly sampling the same number of sister pairs 1,000  
198 times, but choosing those where both members of the pair had the same threat status. We  
199 chose both species to be non-threatened for conifers and both to be threatened for palms as  
200 most identical species pairs in the two clades fell into these two categories (70/85 and 51/68,  
201 respectively). Reassuringly, potential range size of non-threatened conifers and threatened  
202 palms did not differ in our analysis when sister species had the same threat status, supporting  
203 their use as “control” contrasts (t-test:  $t_{177} = 0.183$ ,  $p = 0.855$  and  $t_{124} = 0.597$ ,  $p = 0.552$ ,  
204 respectively). R code to perform our analyses is in Data S1.

205

## 206 **Results**

207 We found that relatively more species were threatened with extinction in faster diversifying  
208 genera (for  $\varepsilon$  of 0.0, 0.5, 0.9:  $t_{507} = 3.64, 3.73, 3.83$ , respectively;  $p < 0.001$  and  $r = 0.15$  for  
209 all). The mean proportion of a genus threatened with extinction more than doubled from 36%  
210 to 84% between the slowest and fastest diversifying genera (fig. 1a). Although these results  
211 could have arisen because faster diversifying genera were younger (fig. 1b), as genus age was  
212 negatively associated with risk status ( $t_{507} = -2.82$ ,  $p = 0.005$ ,  $r = 0.14$ ), diversification rate  
213 was not a simple proxy for age as it had larger effect sizes. A caveat is that we did find some  
214 bias in our dataset. Sampled genera were older and slower diversifying, on average, than  
215 obtained by applying our sampling criteria to the initial tree (i.e. before intersecting with  
216 threat status; table B2). Repeating our analyses with only the genera from the more complete  
217 conifer and palm species-level datasets was also inconclusive (table B3), potentially because

218 of small sample sizes ( $n < 70$ ; fig. B1). Many conifer genera were also highly threatened  
219 despite being old and slowly diversifying (fig. B2).

220 In contrast to our finding across the plant ToL, analyses with the more complete  
221 species-level datasets revealed that older conifers but not palms were relatively more  
222 threatened by extinction ( $z_{431} = 2.17, p = 0.030$  and  $z_{545} = -1.70, p = 0.089$ , respectively; fig.  
223 2a). The absolute mean effect  $\pm$  SE was nearly double in the conifers ( $0.27 \pm 0.12$  vs  $-0.14 \pm$   
224  $0.08$  on log-scale), leading to a 31% absolute increase in the probability of being threatened  
225 over the range of observed ages (fig. 2b).

226 A smaller potential range size increased the extinction risk of older conifers,  
227 supporting the specialism hypothesis. We specifically found that non-threatened conifers had  
228 narrower ranges as their age increased relative to sister species that were threatened (fig. 3);  
229 ranges in neither threat status independently changed with age (table B1). As the age of  
230 conifers increased, this difference between sister-species pairs of contrasting threat status was  
231 larger than expected if sisters had the same threat status ( $r = -0.27, p = 0.025$ ; fig. 3a).  
232 Contrasting threat status did not alter correlations between age and potential range size in  
233 palms, consistent with the lack of an age-extinction association ( $r = -0.14, p = 0.222$ ), and  
234 there was no correlation between species age and absolute range size (table B1). Larger  
235 potential ranges did, however, always reduce extinction risk (table B1). Our results with  
236 conifers and palms were also not simply an artefact of biased sampling as ages and rates did  
237 not markedly differ from observations across entire clades, i.e. before filtering with IUCN  
238 data (table B4).

239

240 **Discussion**

241 Our results implicated range size as a proximate explanation for why clade age and  
242 diversification rate were associated with extinction risk in plants. Although our findings  
243 across the wider plant ToL contrasted those in conifers, they were consistent with the age-  
244 and-area hypothesis in at least two ways. First, young species tend to occupy narrower  
245 geographic and adaptive spaces (Castiglione et al. 2017), particularly as most plant speciation  
246 involves vicariance (Davies et al. 2011; Anacker and Strauss 2014; Igea et al. 2015). Time  
247 may consequently be required for post-speciation range expansions despite much of the  
248 available area remaining favourable for establishment (Pigot et al. 2010; Pigot and Tobias  
249 2013; Anacker and Strauss 2014). Second, if species diversification is density-dependent,  
250 such as because of limited resources, then younger lineages that occupy smaller ranges will  
251 tend to leave more niche space available for young species (Rabosky and Hurlbert 2015).  
252 The consequent increase in rates of species diversification will again elevate extinction risk in  
253 younger lineages if reproductive isolation arises within small geographic and adaptive spaces.  
254 Time-dependent range expansions may be unnecessary under other modes of speciation, e.g.  
255 parapatry or sympatry (Pigot et al. 2010), and if range expansion is not limited post-  
256 speciation (Schurr et al. 2007). These differences in modes of speciation can also help  
257 explain the lack of consistent evidence for age-dependent extinction across the large  
258 taxonomic scale in our study and across animals (Gaston and Blackburn 1997; Johnson et al.  
259 2002; Davies et al. 2011; Arregoitia et al. 2013; Greenberg and Mooers 2017).

260 The global status of conifers differs from palms and other plant clades, potentially  
261 explaining why older species had smaller potential ranges that made them more threatened by  
262 extinction. Conifer species are older on average than the rest of the Qian and Jin (2016) tree  
263 (Welch's  $t$ -test:  $t_{465.5} = 13.71, p < 0.001$ ), and many species are range-restricted (Farjon 1996;  
264 Jordan et al. 2016). Consistent with the evolutionary specialism hypothesis, most old  
265 conifers evolved during warmer wetter climates, where they occupied larger ranges than in

266 the present day (Farjon 1996; Jordan et al. 2016). Old species may have only escaped  
267 extinction by inhabiting climatic refugia that have been historically stable (Leslie et al. 2012;  
268 Condamine et al. 2017). Cycadales, which are closely related to conifers, have undergone  
269 similar range contractions because of global cooling, resulting in presently high extinction  
270 risk (Yessoufou et al. 2017). By contrast, most palm species have occupied relatively large  
271 areas of stable habitat since the Eocene (Kissling et al. 2012), potentially explaining the lack  
272 of age-range correlations. Speciation in palms may have also occurred largely by long-  
273 distance dispersal (Baker and Couvreur 2013), which can produce less range asymmetry  
274 (Gaston 1998). Consequently, palms may lack age-range associations that influence  
275 extinction risk. We also cannot exclude the possibility that palm species that were  
276 susceptible to environmental change have already gone extinct or traits that make them more  
277 prone to extinction are not taxonomically conserved, resulting in no signature of taxon age on  
278 extinction (Arregoitia et al. 2013).

279 Our findings suggest that macro-evolutionary dynamics have some value for  
280 biodiversity conservation. Specifically, we found that these dynamics provided an indicator  
281 of contemporary extinction risk that might be easier to derive for large numbers of taxa than  
282 detailed species-level assessments. Macro-evolutionary dynamics might also offer insight  
283 into the vulnerability of species to future change, as the smaller population and range sizes  
284 that make some species prone to extinction are likely to be carried into the future (Condamine  
285 et al. 2013). Although our results must be interpreted with caution, given biases inherent to  
286 our datasets, they provide new evidence that lineages span a continuum from little species  
287 turnover to producing fast diversifying and extinction-prone taxa (Greenberg and Mooers  
288 2017). The effect of age that we found at different taxonomic scales also suggests similar  
289 patterns should emerge when the plant Tree of Life becomes more densely sampled.

290

291 **Data Accessibility**

292 Data will be deposited in the Dryad repository upon acceptance.

293

294 **Acknowledgements**

295 We thank G. Tanentzapf for the question that inspired this study and G. Jordan for sharing the

296 conifer phylogeny. A Mooers, D. Greenberg, and one anonymous reviewer provided

297 comments that improved an earlier version of this manuscript.

298

299 **Literature Cited**

300 Anacker, B. L., and S. Y. Strauss. 2014. The geography and ecology of plant speciation:

301 range overlap and niche divergence in sister species. *Proceedings of the Royal Society*

302 B 281:20132980.

303 Arregoitia, L. D. V., S. P. Blomberg, and D. O. Fisher. 2013. Phylogenetic correlates of

304 extinction risk in mammals: species in older lineages are not at greater risk.

305 *Proceedings of the Royal Society B* 280:20131092.

306 Baker, W. J., and T. L. P. Couvreur. 2013. Global biogeography and diversification of palms

307 sheds light on the evolution of tropical lineages. I. Historical biogeography. *Journal of*

308 *Biogeography* 40:274–285.

309 Baldwin, B. G. 2014. Origins of plant diversity in the California Floristic Province. *Annual*

310 *Review of Ecology, Evolution, and Systematics* 45:347–369.

311 Bennett, P. M., and I. P. F. Owens. 1997. Variation in extinction risk among birds: chance or

312 evolutionary predisposition? *Proceedings of the Royal Society B* 264:401–408.

313 Castiglione, S., A. Mondanaro, M. Melchionna, C. Serio, M. Di Febbraro, F. Carotenuto, and

314 P. Raia. 2017. Diversification rates and the evolution of species range size frequency

315 distribution. *Frontiers in Ecology and Evolution* 5:147.

- 316 Cayuela, L., Í. G. la Cerda, F. S. Albuquerque, and D. J. Golicher. 2012. taxonstand: An r  
317 package for species names standardisation in vegetation databases. *Methods in*  
318 *Ecology and Evolution* 3:1078–1083.
- 319 Ceolin, G. B., and E. L. H. Giehl. 2017. A little bit everyday: range size determinants in  
320 *Arachis* (Fabaceae), a dispersal-limited group. *Journal of Biogeography* 44:2798–  
321 2807.
- 322 Condamine, F. L., A. B. Leslie, and A. Antonelli. 2017. Ancient islands acted as refugia and  
323 pumps for conifer diversity. *Cladistics* 33:69–92.
- 324 Davies, T. J., G. F. Smith, D. U. Bellstedt, J. S. Boatwright, B. Bytebier, R. M. Cowling, F.  
325 Forest, et al. 2011. Extinction risk and diversification are linked in a plant biodiversity  
326 hotspot. *PLOS Biology* 9:e1000620.
- 327 Farjon, A. 1996. Biodiversity of *Pinus* (Pinaceae) in Mexico: speciation and palaeo-  
328 endemism. *Botanical Journal of the Linnean Society* 121:365–384.
- 329 Faurby, S., W. L. Eiserhardt, W. J. Baker, and J.-C. Svenning. 2016. An all-evidence species-  
330 level supertree for the palms (Arecaceae). *Molecular Phylogenetics and Evolution*  
331 100:57–69.
- 332 Garamszegi, L. Z., and A. P. Møller. 2010. Effects of sample size and intraspecific variation  
333 in phylogenetic comparative studies: a meta-analytic review. *Biological Reviews*  
334 85:797–805.
- 335 Gaston, K. J. 1998. Species-range size distributions: products of speciation, extinction and  
336 transformation. *Philosophical Transactions of the Royal Society B* 353:219–230.
- 337 Gaston, K. J., and T. M. Blackburn. 1997. Evolutionary age and risk of extinction in the  
338 global avifauna. *Evolutionary Ecology* 11:557–565.
- 339 Greenberg, D. A., and A. Ø. Mooers. 2017. Linking speciation to extinction: Diversification  
340 raises contemporary extinction risk in amphibians. *Evolution Letters* 1:40–48.

- 341 Higgins, S. I., R. B. O'Hara, O. Bykova, M. D. Cramer, I. Chuine, E.-M. Gerstner, T.  
342 Hickler, et al. 2012. A physiological analogy of the niche for projecting the potential  
343 distribution of plants. *Journal of Biogeography* 39:2132–2145.
- 344 Ho, T., L. Si, and C. Ané. 2014. A linear-time algorithm for Gaussian and non-Gaussian trait  
345 evolution models. *Systematic Biology* 63:397–408.
- 346 Hodge, J., and D. R. Bellwood. 2015. On the relationship between species age and  
347 geographical range in reef fishes: are widespread species older than they seem?  
348 *Global Ecology and Biogeography* 24:495–505.
- 349 Igea, J., D. Bogarín, A. S. T. Papadopulos, and V. Savolainen. 2015. A comparative analysis  
350 of island floras challenges taxonomy-based biogeographical models of speciation.  
351 *Evolution* 69:482–491.
- 352 International Union for Conservation of Nature [IUCN]. 2016. The IUCN Red List of  
353 Threatened Species. Available at: <http://www.iucnredlist.org>
- 354 Ives, A. R. 2015. For testing the significance of regression coefficients, go ahead and log-  
355 transform count data. *Methods in Ecology and Evolution* 6:828–835.
- 356 Jetz, W., and R. P. Freckleton. 2015. Towards a general framework for predicting threat  
357 status of data-deficient species from phylogenetic, spatial and environmental  
358 information. *Philosophical Transactions of the Royal Society B* 370:20140016.
- 359 Johnson, C. N., S. Delean, and A. Balmford. 2002. Phylogeny and the selectivity of  
360 extinction in Australian marsupials. *Animal Conservation* 5:135–142.
- 361 Jordan, G. J., P. A. Harrison, J. R. P. Worth, G. J. Williamson, and J. B. Kirkpatrick. 2016.  
362 Palaeoendemic plants provide evidence for persistence of open, well-watered  
363 vegetation since the Cretaceous. *Global Ecology and Biogeography* 25:127–140.
- 364 Kissling, W. D., W. L. Eiserhardt, W. J. Baker, F. Borchsenius, T. L. P. Couvreur, H.  
365 Balslev, and J.-C. Svenning. 2012. Cenozoic imprints on the phylogenetic structure of

- 366 palm species assemblages worldwide. *Proceedings of the National Academy of*  
367 *Sciences* 109:7379–7384.
- 368 Leslie, A. B., J. M. Beaulieu, H. S. Rai, P. R. Crane, M. J. Donoghue, and S. Mathews. 2012.  
369 Hemisphere-scale differences in conifer evolutionary dynamics. *Proceedings of the*  
370 *National Academy of Sciences* 109:16217–16221.
- 371 Liow, L. H. 2007. Lineages with long durations are old and morphologically average: an  
372 analysis using multiple datasets. *Evolution* 61:885–901.
- 373 Magallon, S., and M. J. Sanderson. 2001. Absolute diversification rates in angiosperm clades.  
374 *Evolution* 55:1762–1780.
- 375 Orme, D. 2013. The caper Package: Comparative Analysis of Phylogenetics and Evolution in  
376 R. Available at: <https://cran.r-project.org/web/packages/caper/vignettes/caper.pdf>
- 377 Paul, J. R., C. Morton, C. M. Taylor, and S. J. Tonsor. 2009. Evolutionary time for dispersal  
378 limits the extent but not the occupancy of species' potential ranges in the tropical  
379 plant genus *Psychotria* (Rubiaceae). *American Naturalist* 173:188–199.
- 380 Pennell, M. W., R. G. FitzJohn, and W. K. Cornwell. 2016. A simple approach for  
381 maximizing the overlap of phylogenetic and comparative data. *Methods in Ecology*  
382 *and Evolution* 7:751–758.
- 383 Pigot, A. L., A. B. Phillimore, I. P. F. Owens, and C. D. L. Orme. 2010. The shape and  
384 temporal dynamics of phylogenetic trees arising from geographic speciation.  
385 *Systematic Biology* 59:660–673.
- 386 Pigot, A. L., and J. A. Tobias. 2013. Species interactions constrain geographic range  
387 expansion over evolutionary time. *Ecology Letters* 16:330–338.
- 388 Pimm, S. L., C. N. Jenkins, R. Abell, T. M. Brooks, J. L. Gittleman, L. N. Joppa, P. H.  
389 Raven, et al. 2014. The biodiversity of species and their rates of extinction,  
390 distribution, and protection. *Science* 344:1246752.



- 391 Purvis, A., J. L. Gittleman, G. Cowlishaw, and G. M. Mace. 2000. Predicting extinction risk  
392 in declining species. *Proceedings of the Royal Society B* 267:1947–1952.
- 393 Qian, H., and Y. Jin. 2016. An updated megaphylogeny of plants, a tool for generating plant  
394 phylogenies and an analysis of phylogenetic community structure. *Journal of Plant  
395 Ecology* 9:233–239.
- 396 Rabosky, D. L., and A. H. Hurlbert. 2015. Species richness at continental scales is dominated  
397 by ecological limits. *American Naturalist* 185:572–583.
- 398 Roncal, J., M. Couderc, P. Baby, F. Kahn, B. Millán, A. W. Meerow, and J.-C. Pintaud. 2015.  
399 Palm diversification in two geologically contrasting regions of western Amazonia.  
400 *Journal of Biogeography* 42:1503–1513.
- 401 Savolainen, V., M.-C. Anstett, C. Lexer, I. Hutton, J. J. Clarkson, M. V. Norup, M. P. Powell,  
402 et al. 2006. Sympatric speciation in palms on an oceanic island. *Nature* 441:210–213.
- 403 Scholl, J. P., and J. J. Wiens. 2016. Diversification rates and species richness across the Tree  
404 of Life. *Proceedings of the Royal Society B* 283:20161334.
- 405 Schwery, O., and B. C. O’Meara. 2016. MonoPhy: a simple R package to find and visualize  
406 monophyly issues. *PeerJ Computer Science* 2:e56.
- 407 Schwartz, M. W., and D. Simberloff. Taxon size predicts rates of rarity in vascular plants.  
408 *Ecology Letters* 4:464–469.
- 409 Slatyer, R. A., M. Hirst, and J. P. Sexton. 2013. Niche breadth predicts geographical range  
410 size: a general ecological pattern. *Ecology Letters* 16:1104–1114.
- 411 Tanentzap, A. J., A. J. Brandt, R. D. Smissen, P. B. Heenan, T. Fukami, and W. G. Lee.  
412 2015. When do plant radiations influence community assembly? The importance of  
413 historical contingency in the race for niche space. *New Phytologist* 207:468–479.
- 414 Valente, L. M., V. Savolainen, and P. Vargas. 2010. Unparalleled rates of species  
415 diversification in Europe. *Proceedings of the Royal Society B* 277:rsrb20092163.

- 416 Vamosi, J. C., and J. R. U. Wilson. 2008. Nonrandom extinction leads to elevated loss of  
417 angiosperm evolutionary history. *Ecology Letters* 11:1047–1053.
- 418 Williams, S. E., Williams, Y. M., VanDerWal, J., Isaac, J. L., Shoo, L. P., and C. N. Johnson.  
419 2009. Ecological specialization and population size in a biodiversity hotspot: How  
420 rare species avoid extinction. *Proceedings of the National Academy of Sciences* 106:  
421 19737–19741.
- 422 Willis, J. C. 1926. Age and area. *Quarterly Review of Biology* 1:553–571.
- 423 Wilson, E. O. 1959. Adaptive shift and dispersal in a tropical ant fauna. *Evolution* 13:122–  
424 144.
- 425 Yessoufou, K., B. H. Daru, R. Tafirei, H. O. Elansary, and I. Rampedi. 2017. Integrating  
426 biogeography, threat and evolutionary data to explore extinction crisis in the  
427 taxonomic group of cycads. *Ecology and Evolution* 7:2735–2746.
- 428 Zanne A. E., D. C. Tank, W. K. Cornwell, J. M. Eastman, S. A. Smith, R. G. FitzJohn, D J.  
429 McGlinn, et al. 2014. Three keys to the radiation of angiosperms into freezing  
430 environments. *Nature* 506:89–92.
- 431 Žliobaitė, I., M. Fortelius, and N. C. Stenseth. 2017. Reconciling taxon senescence with the  
432 Red Queen’s hypothesis. *Nature* 552:92–95.

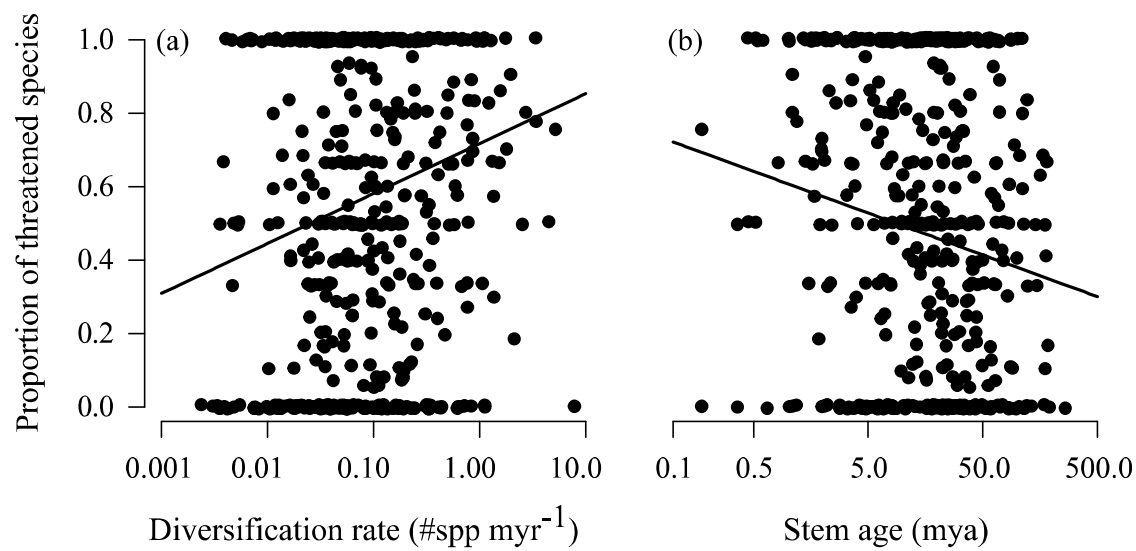

433

Diversification rate (#spp myr<sup>-1</sup>)

Stem age (mya)

434 **Figure 1.** More species are threatened with extinction in (a) faster diversifying and (b)

435 younger genera. Diversification was estimated for  $\varepsilon = 0.50$ . Solid lines are mean

436 associations estimated by PGLS.

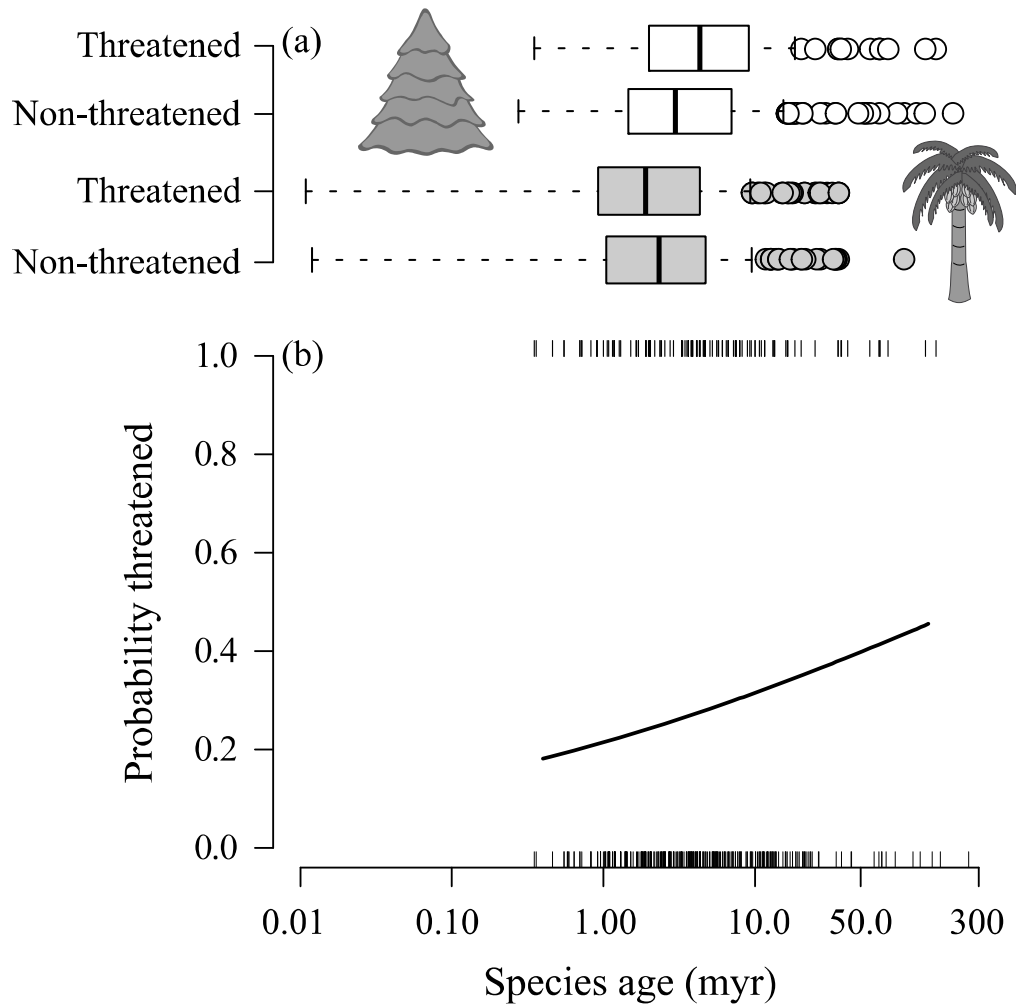

437

438 **Figure 2.** Older conifers but not palms have a greater probability of being threatened by  
 439 extinction. (a) Boxplot for stem ages of conifer (white,  $n = 433$ ) and palm (grey,  $n = 547$ )  
 440 species that were classified as either threatened or non-threatened. Solid line is median, box  
 441 is inter-quartile range, whiskers extend 1.5-times the interquartile range, and points are  
 442 outliers. (b) Change in probability of a conifer being classified as threatened with species  
 443 age. Solid line is mean association estimated by phylogenetic logistic regression.

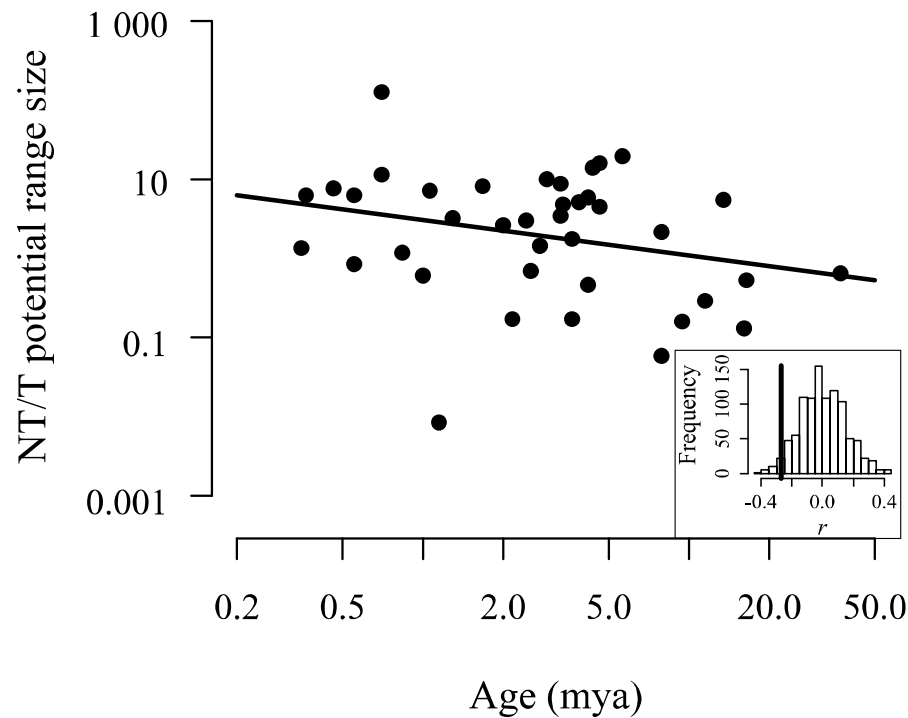

444

445 **Figure 3. Differences in range size between sister conifers of contrasting threat status**  
446 **decrease with their age.** For each sister pair of non-threatened (NT) and threatened (T) taxa  
447 we calculated the difference in log-transformed potential range sizes. Solid line is the slope  
448 for the corresponding correlation coefficient  $r$ . Inset shows frequency distribution of  $r$   
449 calculated for 1,000 random simulations of sister pairs of the same threat category, with  
450 vertical line denoting observed correlation for contrasting threat status, i.e. corresponding to  
451 plotted data points.
